# Supplementary material
Source: Springer Nature journal article supplement (https://www.springermedizin.de/resource/supplementary/12984_2012_496_MOESM4_ESM.pdf/9604722)

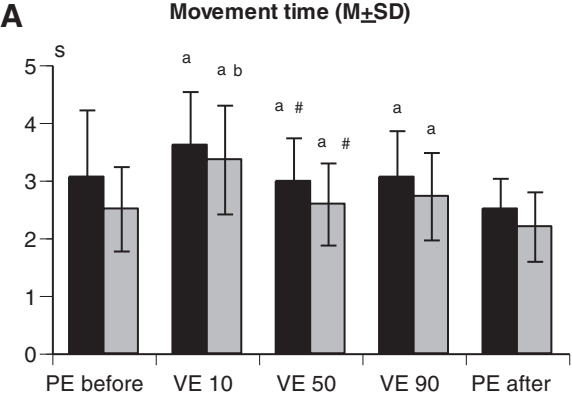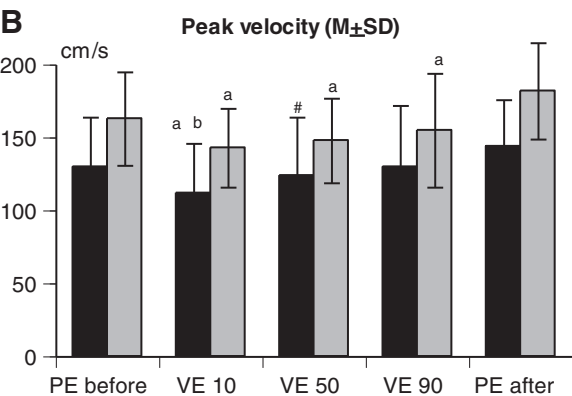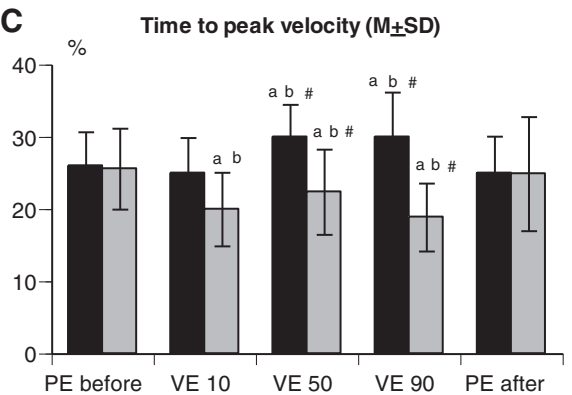

Groups: TBI control

Supplement: MOESM4 [file 9604722]
